# Supplementary material
Source: PubMed Central journal article supplement (PMC6327977)
Supplement: NIHMS1515797-supplement-1.pdf [file NIHMS1515797-supplement-1.pdf]

## SUPPLEMENTAL TABLES

**Table S1. A list of genes that are differentially transcribed between Myt1<sup>+</sup>Neurog3<sup>+</sup> and Myt1<sup>-</sup>Neurog3<sup>+</sup> progenitor cells. Related to Figure 1.** Only genes with a *p* value below 0.05 were listed. Note that for each gene, the average and SEM were provided, together with the *p*-value.

**Table S2. Lists of genes associated with DMRs between *Neurog3*<sup>eGFP/eGFP</sup> null and *Neurog3*<sup>eGFP/+</sup> heterozygous cell populations. Related to Figure 5.** Official genes names were presented.

**Table S3. The number of cells counted for all quantification processes. Related to Figure 2, 4, 6.** The corresponding panel was noted in each set of data.

## SUPPLEMENTARY FIGURES

**Figure S1. The heterogeneity of Neurog3<sup>+</sup> cells in the developing pancreas. Related to Figure 1.** (A, B) Co-immunostaining of Myt1 and Neurog3 in E10.5 and E14.5 embryonic pancreata. Arrowheads, single Ngn3<sup>+</sup> cells. Arrows, double Neurog3<sup>+</sup>TF<sup>+</sup> cells. (C) Quantification of Neurog3<sup>+</sup> cells that co-express Myt1, Pax6, and Pdx1 at different stages. Error bars, SEM. (D, E) Co-immunostaining of Pax6 or Pdx1 with Neurog3 in E14.5 pancreata. Arrowheads, single Ngn3<sup>+</sup> cells. Arrows, double Neurog<sup>+</sup>TF<sup>+</sup> cells. Scale bars=20 μm. (F) Gating strategy for flow sorting *eGFP*-expressing cells for downstream scRNA-seq analysis. (G) Evaluation of doublet rate of scRNA-seq experiments by co-encapsulating human K562 cells with E14.5 mouse pancreatic cells. Mouse (Y-axis) or human (X-axis) β-actin transcript counts are plotted for each filtered barcode representing a cell. (H) t-SNE analysis of 1,635 GFP-sorted cells from two biological replicate experiments. Black and grey

represent each replicate and the degree of mixing between the two colors indicates the relative absence of batch effects. (I1-I5) Overlays of non-endocrine cell lineage specific gene markers on t-SNE, with identified populations manually annotated. Overlays represent gene expression levels on a variance normalized (Asinh) scale. (J1-5) Overlays of endocrine cell-type specific gene markers on t-SNE. Overlays represent gene expression levels on a variance normalized (Asinh) scale. There were not enough intermediate cell states connecting *Sst*-expressing cell states to the general endocrine cluster (J5). The general endocrine population was gated for downstream p-Creode analysis of endocrine differentiation.

**Figure S2. *nCre* and *cCre* expression-based lineage tracing. Related to Figure 2.** (A, B)

Insulin staining and  $\beta$ -cell area quantification in control (no transgene) and *Myt1<sup>cCre</sup>*; *Neurog3<sup>nCre</sup>*; *Ai9* (*MNA*) compound mice. (C) Random blood glucose of newly-born control and *MNA* mice. (D) Intraperitoneal glucose tolerance test of control and *MNA* mice 6-week after birth. (E-G) Combinatorial lineage tracing of *Myt1<sup>+</sup>Neurog3<sup>+</sup>* cells in P1 *Myt1<sup>cCre</sup>*; *Neurog3<sup>tg-nCre</sup>*; *Ai9* mice. Note that *Neurog3<sup>tg-nCre</sup>* is a BAC-based transgene, so that its presence does not interfere with *Neurog3* production in progenitor cells. (E, F) Representative images of *Ins*, *Gcg*, and *Sst* co-staining with tdTomato production (red). (G) Quantification of lineage marked cells in P1 *Myt1<sup>cCre</sup>*; *Neurog3<sup>tg-nCre</sup>*; *Ai9* mice (n=4-5). Scale bar in F=20  $\mu$ m.

**Figure S3: Supervised analysis of *Myt1<sup>+</sup>* and *Myt1<sup>-</sup>* endocrine progenitor cells using PLSDA on scRNA-seq data. Related to Figure 3.** (A) Gating strategy for *Myt1<sup>+</sup>* and *Myt1<sup>-</sup>*

endocrine progenitor cells. Endocrine progenitor cells were gated from the general endocrine population in Figure S1 for cells that do not express differentiated cell product genes, such as *Ins1*, *Gcg*, *Ghrl*, *Ppy*, *Sst*, resulting in 550 total endocrine progenitor cells. Progenitors were further gated for *Myt1* positivity (151 cells – 27%) and negativity (399 cells – 73%) for downstream PLSDA analysis. (B) Variance captured of the PLSDA model constructed from *Myt1*<sup>+</sup> and *Myt1*<sup>-</sup> endocrine progenitor cells as a function of the number of latent variables included. (C) Calibration (cal) and cross-validation (CV) error of the PLSDA model as a function of the number of latent variables included. (D) List of the top 20 biological processes. Red font highlights the epigenetic-based processes. (E, F) t-SNE overlay of *Arx* and *Pax4* expression in flow-sorted *Neurog3*-expressing cells. Note the differential temporal expression of *Arx* (E) and *Pax4* (F) within the endocrine lineage.

**Figure S4. Epigenetic manipulation on islet-cell type allocation. Related to Figure 4.**

(A-G) E12.5 pancreatic buds cultured five days in DMSO or 5  $\mu$ M Adox were used for all assays. (A-D) *Neurog3*, *Myt1*, and *Pdx1* production in pancreatic buds in 5  $\mu$ M Adox (A, B) or DMSO (C, D). (E-G) *Ins* and *Gcg* staining and quantification. (H-N) Effects of AzaC on islet cell allocation. E12.5 pancreatic buds cultured five days in DMSO or 2  $\mu$ M AzaC were used for all assays. (H-J) *MafB*/*Gcg* production in pancreatic buds. (J) Real-time RT-PCR of *Arx*/*Gcg* transcription in pancreatic buds (higher  $\Delta$ CT means higher expression). (K, L) Assays for cleaved Caspase3 (*Cas3*), an apoptotic marker, in cultured pancreatic buds. (M, N) Cell proliferation in cultured pancreatic buds. (O-Q) Effects of *Dnmt3b* overexpression on islet cell allocation. TetO-based *Dnmt3b* overexpression (*Dnmt3b*<sup>OE</sup>) was driven by *Pdx1cre* in combination with *Rosa26*<sup>rTTA-ires-eGFP</sup>, which resulted in the expression of rTTA in most

pancreatic cells. Dox was added from E10.5 until tissue collection at E16.5. Scale bars in all panels, 20  $\mu\text{m}$ .

**Figure S5. Methylation status in CpG islands of pancreatic progenitors. Related to**

**Figure 5.** *Neurog3* expressing cells sorted from E14.5 *Neurog3<sup>eGFP/+</sup>* or *Neurog3<sup>eGFP/eGFP</sup>*

pancreata were used for DNA isolation and bisulfite sequencing for PCR (A) or sequencing (B, C). (A) Methylation CpG islands of *Pax4*, *Pax6*, *Pdx1*, *Nkx2.2*, and *Nkx6.1*, assayed via PCR-sequencing. The locations of the reported CpG islands were marked by their relative position to the transcription initiation site. Black circles indicate methylated CpG dinucleotide. (B, C) Some DMRs from genome-wide methylome assays. (B) Differentially Methylated Regions (DMRs) in *Ngn3* null and Heterozygous cells. Note that the majority of the DMRs were hypomethylated in the *Ngn3* heterozygous cells. (C) The relative locations of DMRs relative most genes.

**Figure S6. Methylation status near the *Nkx6.1* and *Arx* loci. Related to Figure 5. (A)**

Locations of several differentially methylated regions (DMRs, red rectangles) ~60 kilobases 3' to *Nkx6.1* between *Ngn3*-heterozygous (het) and null cells (E14.5). The hypomethylated regions (HMRs) were annotated with grey rectangles above each track. (B) The methylation states near the *Nkx6.1* transcription units. The CpG island examined via PCR-based sequencing, 5' end of *Nkx6.1* transcript, was marked with green rectangle. (C, D) Methylation states near *Arx* locus, in *Ngn3* het and null cells. The green rectangle indicates the location of UR2.

**Figure S7: Transcriptomic homogeneity of the E14.5 *Neurog3*<sup>eGFP/eGFP</sup> pancreas.**

**Related to Figure 7.**

t-SNE analysis of scRNA-seq data generated from E14.5 flow-sorted *Neurog3*<sup>eGFP/eGFP</sup> cells overlaid with cell lineage gene markers (A-C), *Neurog3*-dependent genes (D-F), *Neurog3*-independent genes (G), and genes for epigenetic modifying enzymes (H-L). (C) CD68 marks the presence of immune cells within flow-sorted GFP+ cells. Overlays represent gene expression levels on a variance normalized (Asinh) scale.

Figure S1

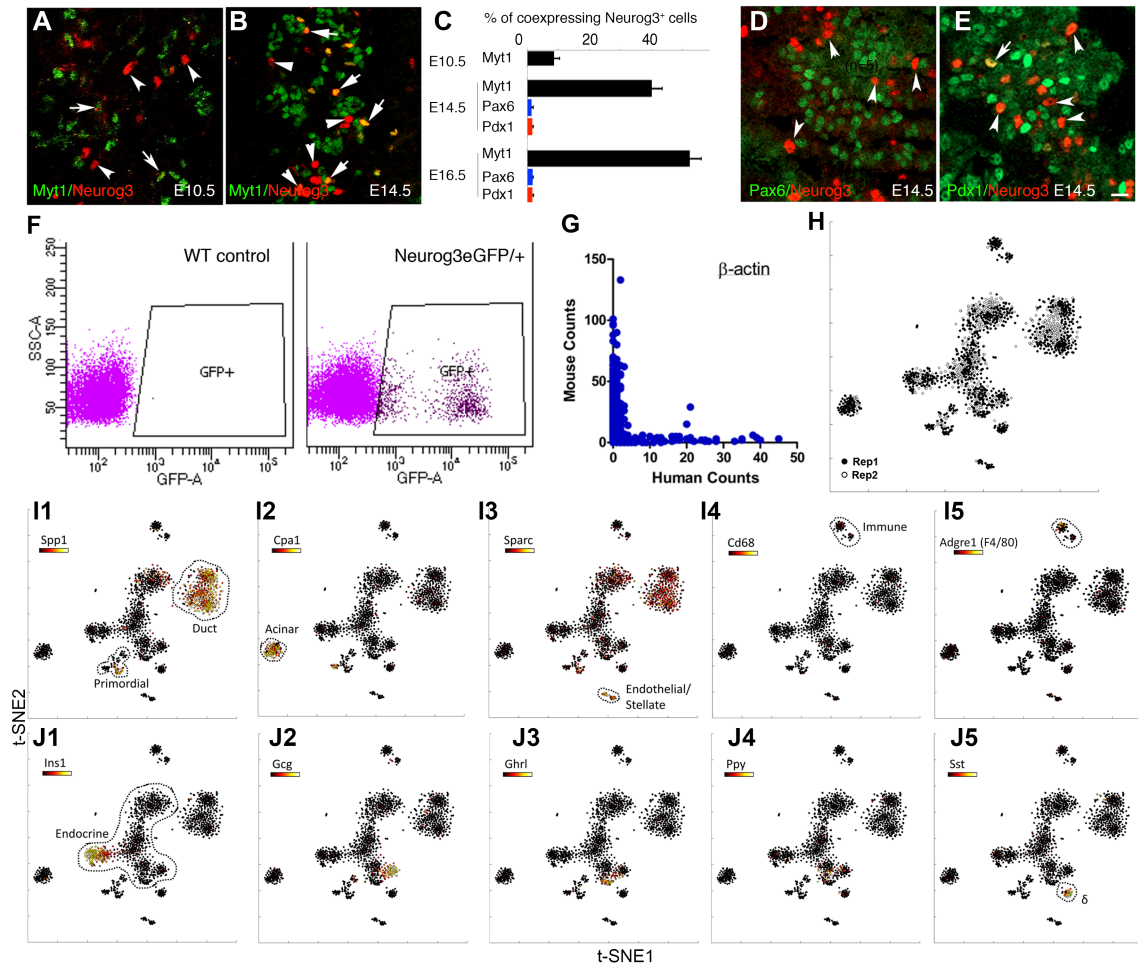

Figure S2

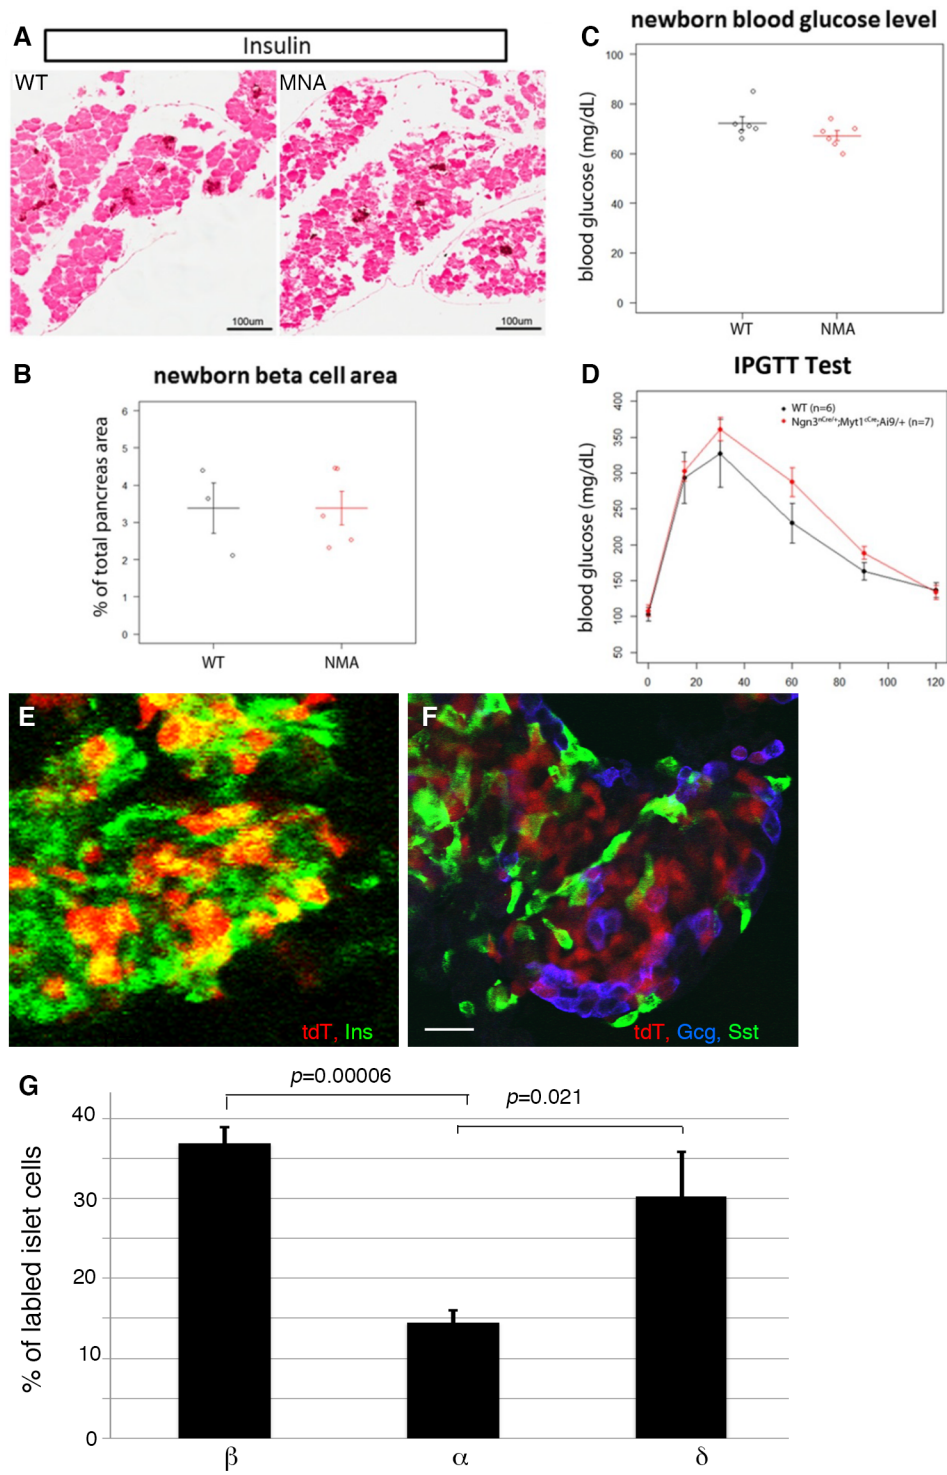

Figure S3

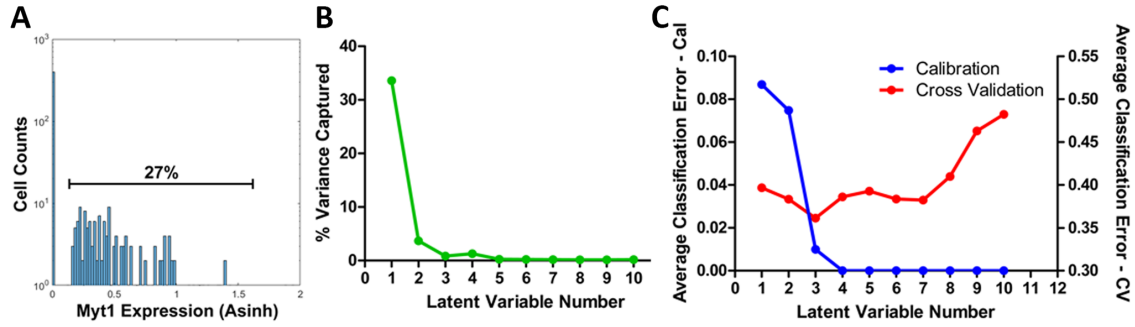

**D**

| Ranked by Over-Representation in Myt1+ Progenitor Cells      |          |          | Ranked by p-value of Change in Myt1+ Cells        |          |          |
|--------------------------------------------------------------|----------|----------|---------------------------------------------------|----------|----------|
| Name                                                         | NES      | p-value  | NAME                                              | NES      | p-value  |
| CARD_MIR302A_TARGETS                                         | 2.146262 | 0        | BILANGES_SERUM_RESPONSE_TRANSLATION               | 1.682421 | 0        |
| REACTOME_PEPTIDE_CHAIN_ELONGATION                            | 2.144373 | 0        | TIEN_INTESTINE_PROBIOTICS_6HR_UP                  | 1.677463 | 0        |
| REACTOME_TRANSLATION                                         | 2.117292 | 0        | MYLLYKANGAS_AMPLIFICATION_HOT_SPOT_17             | 1.672686 | 0.002039 |
| BILANGES_SERUM_AND_RAPAMYCIN_SENSITIVE_GENES                 | 2.115847 | 0        | KIM_HYPOXIA                                       | 1.663031 | 0.001006 |
| REACTOME_3_UTR_MEDIATED_TRANSLATIONAL_REGULATION             | 2.108974 | 0        | KEGG_O_GLYCAN_BIOSYNTHESIS                        | 1.64849  | 0.00503  |
| REACTOME_ACTIVATION_OF_THE_MRNA_UPON_BINDING_OF_THE_CAP_BIND | 2.095533 | 0.001658 | SATO_SILENCED_EPIGENETICALLY_IN_PANCREATIC_CANCER | 1.637171 | 0.002002 |
| KEGG_RIBOSOME                                                | 2.085503 | 0        | VALK_AML_CLUSTER_2                                | 1.635628 | 0.005045 |
| BILANGES_SERUM_RESPONSE_TRANSLATION                          | 2.065363 | 0        | ST_GRANULE_CELL_SURVIVAL_PATHWAY                  | 1.613056 | 0.00503  |
| REACTOME_METABOLISM_OF_MRNA                                  | 2.061899 | 0        | LU_TUMOR_ENDOTHELIAL_MARKERS_UP                   | 1.611025 | 0.007121 |
| REACTOME_INFLUENZA_VIRAL_RNA_TRANSCRIPTION_AND_REPLICATION   | 2.044164 | 0        | REACTOME_IL_RECEPTOR_SHC_SIGNALING                | 1.605915 | 0.006018 |
| REACTOME_NONSENSE_MEDIATED_DECAY_ENHANCED_BY_THE_EXON_JUNCT  | 2.038317 | 0        | JOHNSTONE_PARVB_TARGETS_1_DN                      | 1.59415  | 0        |
| MODY_HIPPOCAMPUS_PRENATAL                                    | 2.036073 | 0        | HWANG_PROSTATE_CANCER_MARKERS                     | 1.586541 | 0.00603  |
| REACTOME_METABOLISM_OF_RNA                                   | 2.035289 | 0        | SPIRA_SMOKERS_LUNG_CANCER_UP                      | 1.58324  | 0.003    |
| REACTOME_INFLUENZA_LIFE_CYCLE                                | 2.005113 | 0        | PID_WNT_NONCANONICAL_PATHWAY                      | 1.57197  | 0.005005 |
| JISON_SICKLE_CELL_DISEASE_DN                                 | 2.004642 | 0        | POMEROY_MEDULLOBLASTOMA_PROGNOSIS_DN              | 1.571185 | 0.004    |
| REACTOME_FORMATION_OF_THE_TERNARY_COMPLEX_AND_SUBSEQUENTLY   | 1.984259 | 0.001739 | DORN_ADENOVIRUS_INFECTION_12HR_UP                 | 1.569836 | 0.00603  |
| SCHLESINGER_H3K27ME3_IN_NORMAL_AND_METHYLATED_IN_CANCER      | 1.970417 | 0        | BIOCARTA_BIOPEPTIDES_PATHWAY                      | 1.56631  | 0.004    |
| REACTOME_SRP_DEPENDENT_COTRANSLATIONAL_PROTEIN_TARGETING_TO  | 1.964618 | 0        | GENTILE_UV_RESPONSE_CLUSTER_D7                    | 1.565343 | 0.006018 |
| HSIAO_HOUSEKEEPING_GENES                                     | 1.961317 | 0        | OUYANG_PROSTATE_CANCER_PROGRESSION_DN             | 1.56488  | 0.015244 |
| LEE_AGING_MUSCLE_UP                                          | 1.953731 | 0        | DORN_ADENOVIRUS_INFECTION_24HR_DN                 | 1.562333 | 0.003    |

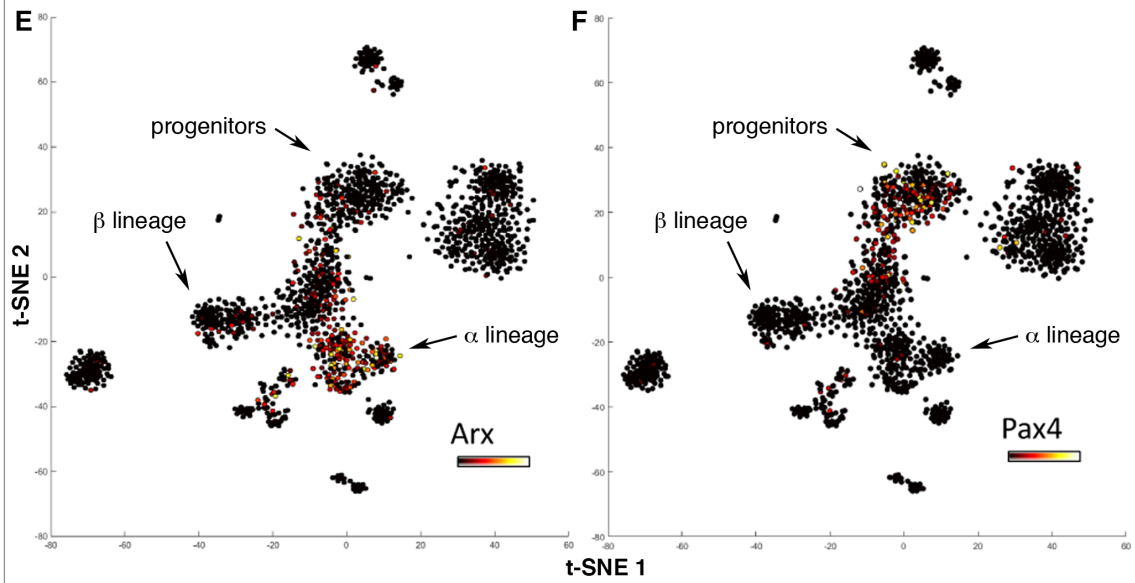



Figure S4

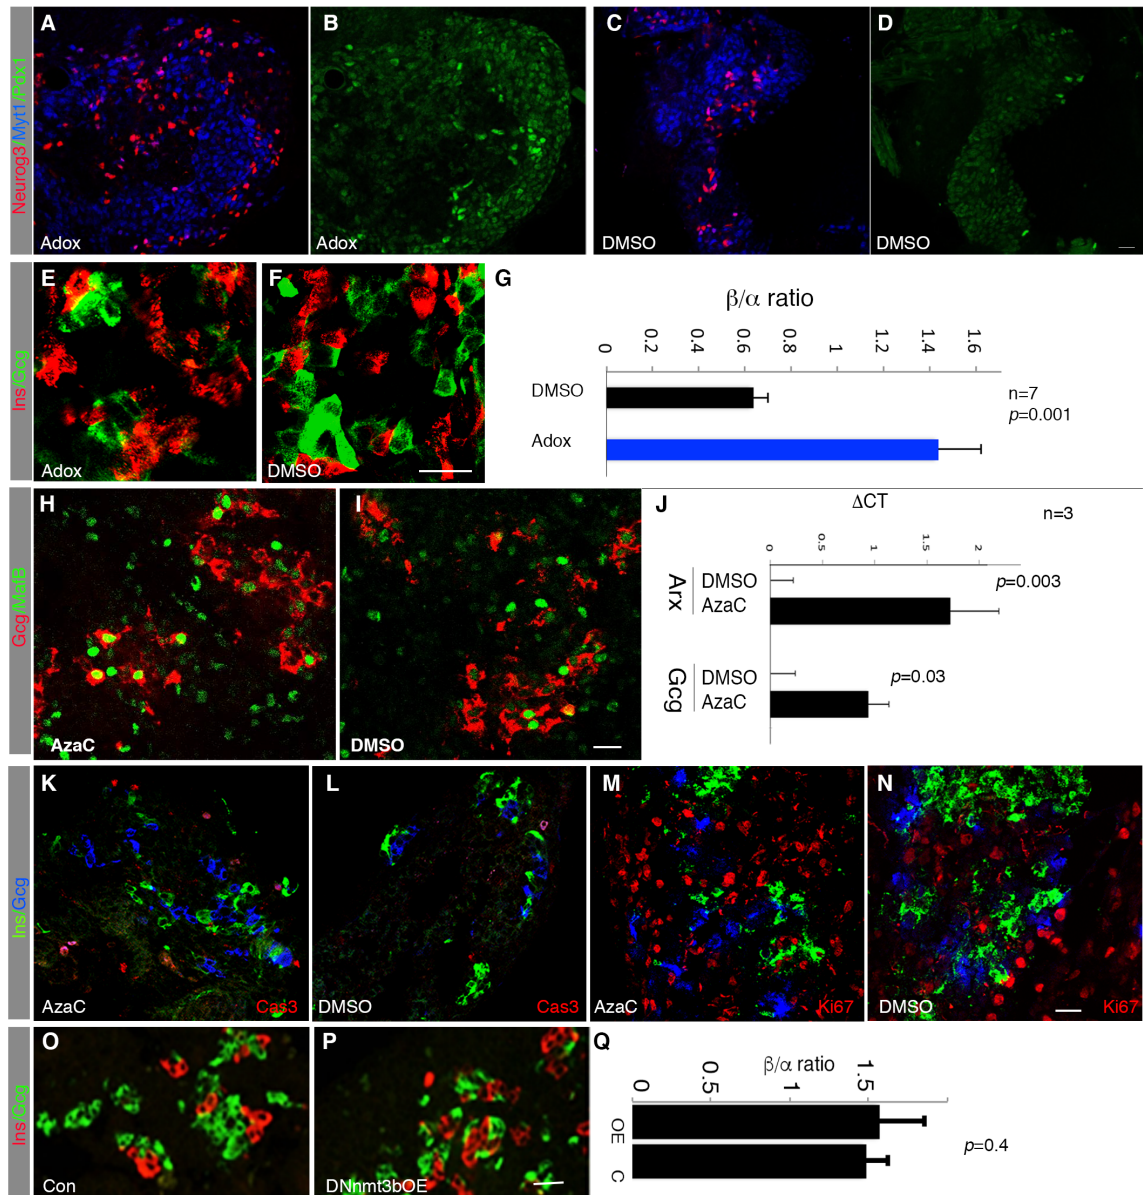

**Figure S5**

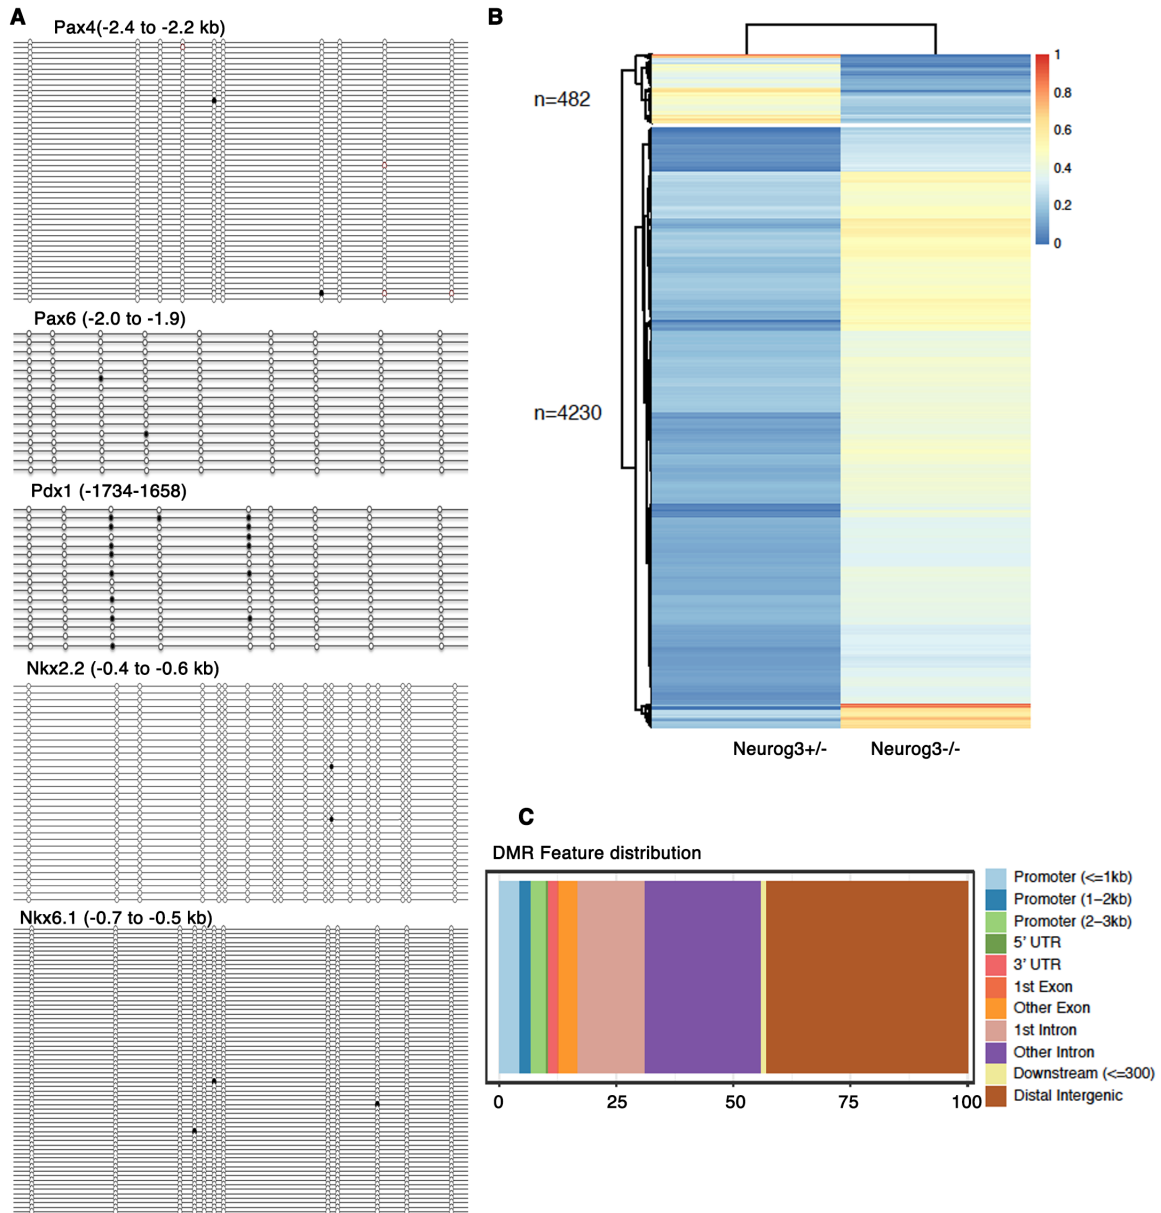

Figure S6

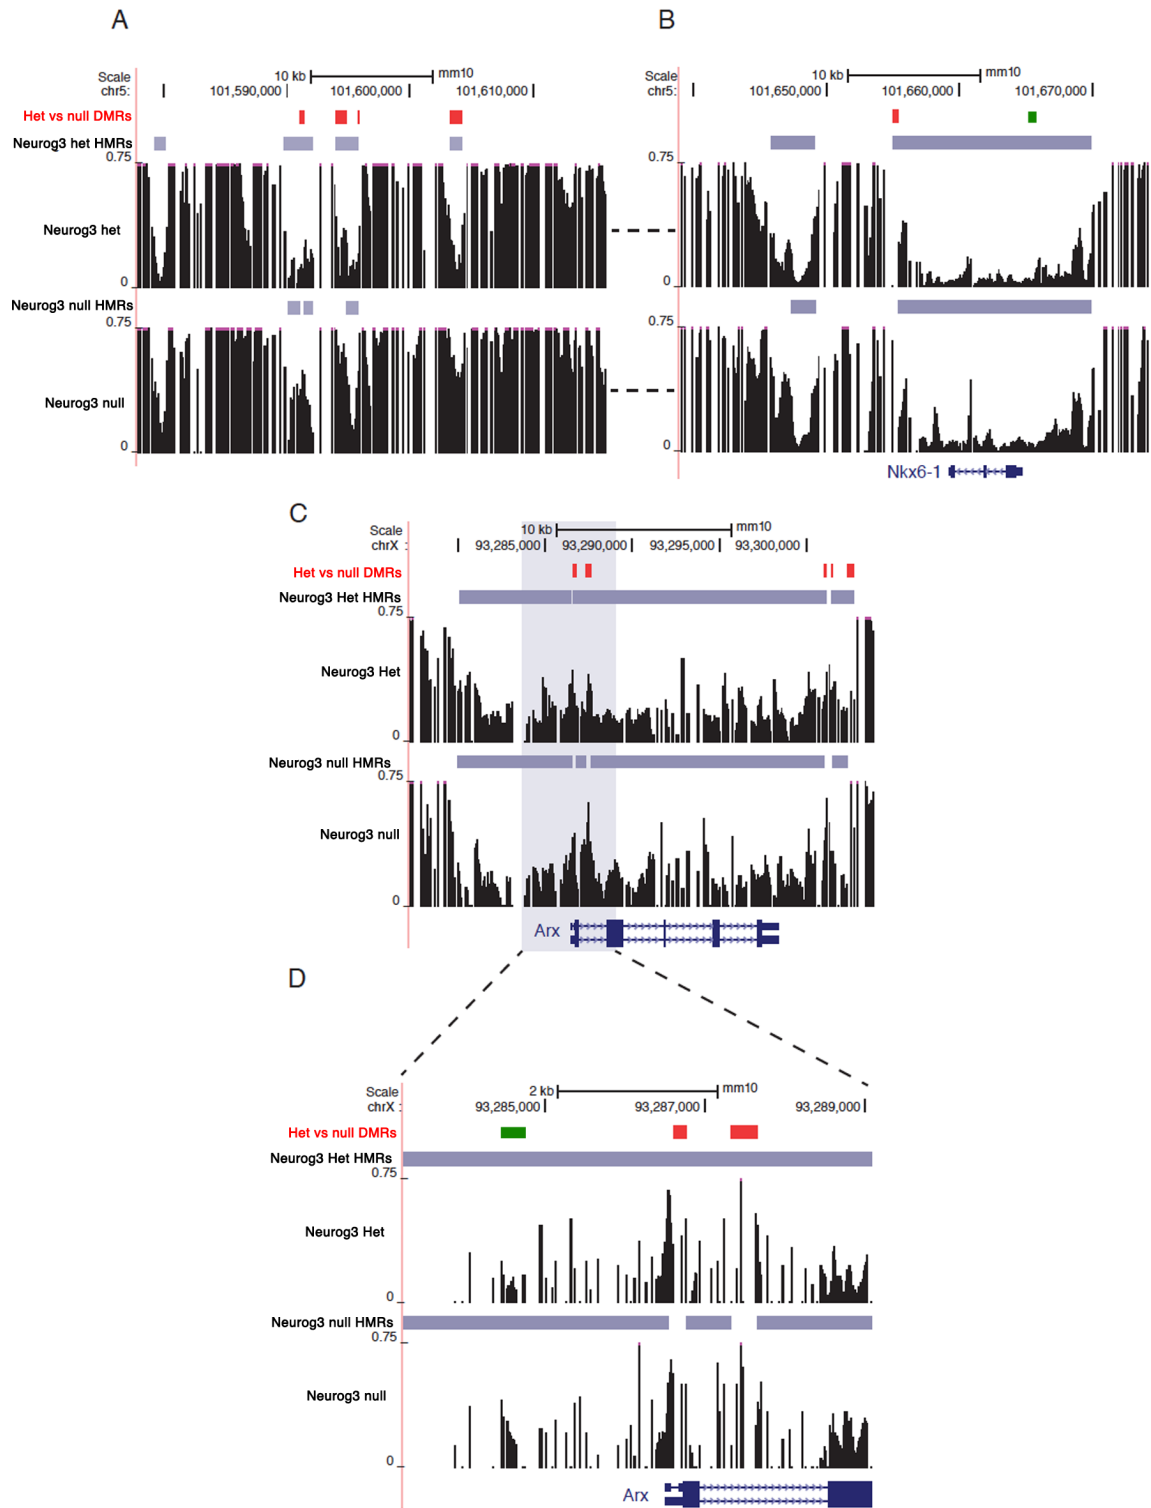

Figure S7

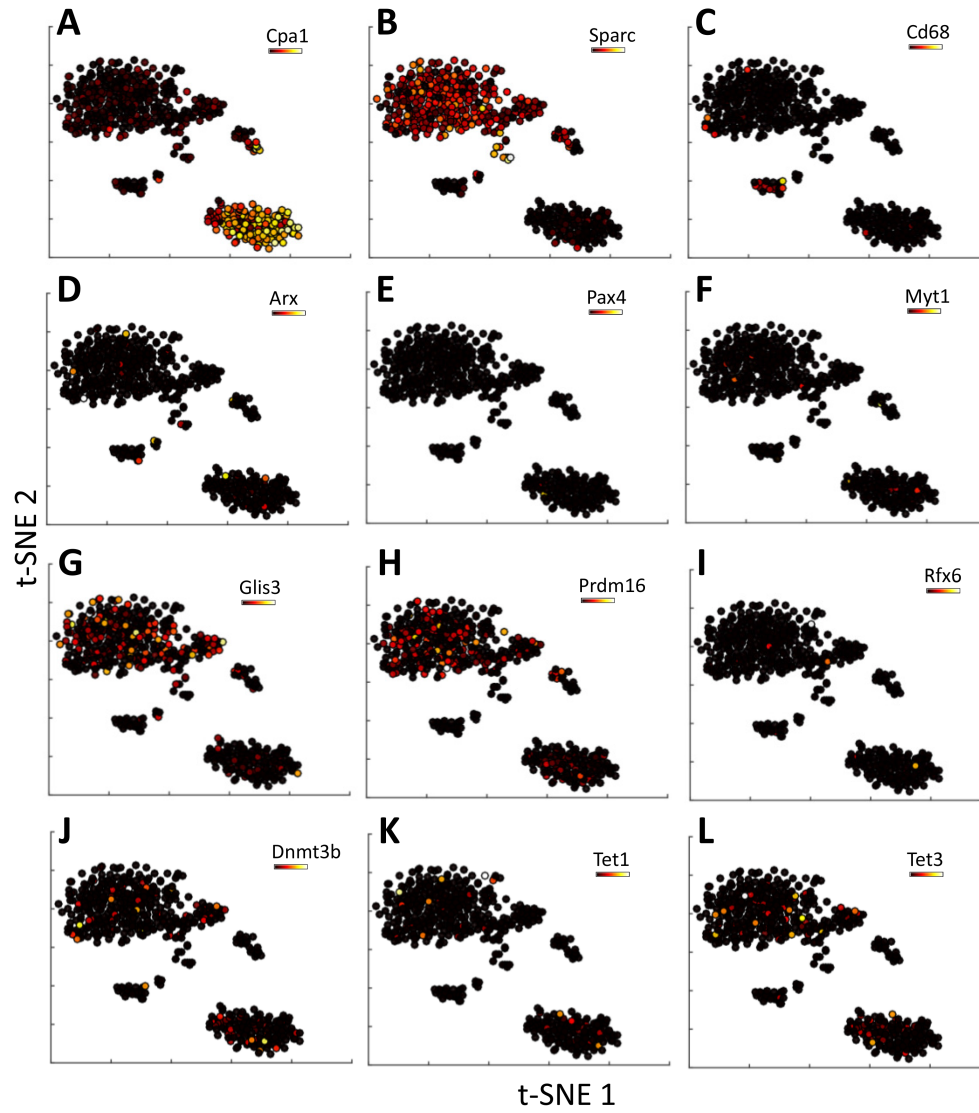

**Supplementary Table 3**

**cell number quantifications used in each figure graph**

|           |                   |            |      |    |       |     |       |       |       |       |       |        |       |   |     |     |   |     |     |   |   |   |     |     |   |   |     |     |     |
|-----------|-------------------|------------|------|----|-------|-----|-------|-------|-------|-------|-------|--------|-------|---|-----|-----|---|-----|-----|---|---|---|-----|-----|---|---|-----|-----|-----|
|           | beta- trajectory  | Cell #     | 16   | 13 | 24    | 37  | 47    | 19    | 22    | 20    | 6     | 9      | 4     | 2 | 2   | 1   | 4 | 3   | 2   | 1 | 2 | 3 | 5   | 9   | 3 | 4 | 5   | 6   | 37  |
|           |                   | Expression | 0.32 | 0  | 0.485 | 0.2 | 0.189 | 0.153 | 0.532 | 0.119 | 0.565 | 0.0556 | 0.211 | 0 | 0   | 0   | 0 | 0   | 0.2 | 0 | 0 | 0 | 0.2 | 0.1 | 0 | 0 | 0.4 | 0.2 | 0.2 |
| Figure 1H | alpha- trajectory | Cell #     | 7    | 4  | 9     | 5   | 11    | 10    | 6     | 7     | 13    | 10     | 6     | 3 | 3   | 2   | 6 | 12  |     |   |   |   |     |     |   |   |     |     |     |
|           |                   | Expression | 0    | 0  | 0.108 | 0   | 0.271 | 0.501 | 0     | 0     | 0     | 0      | 0.272 | 0 | 0.3 | 0.2 | 0 | 0.1 |     |   |   |   |     |     |   |   |     |     |     |

|            | mouse # | ins+tDT+ | Ins+ | Gcg+ | SS+  | PP+ | Horm+ | mice # | RFP+ | Horm+ |     |     |
|------------|---------|----------|------|------|------|-----|-------|--------|------|-------|-----|-----|
|            | #11     | 1176     | 2222 | 316  | 2500 | 155 | 404   | 106    | 383  | #1    | 127 | 432 |
|            | #4      | 1114     | 2320 | 215  | 2013 | 102 | 247   | 78     | 387  | #2    | 109 | 317 |
|            | #1      | 703      | 1341 | 245  | 796  | 154 | 392   | 62     | 226  | #3    | 152 | 390 |
|            | #2      | 694      | 1387 | 159  | 1207 | 84  | 231   | 70     | 236  | #4    | 73  | 221 |
|            | #3      | 799      | 1098 | 199  | 1123 | 73  | 242   | 94     | 247  | #5    | 129 | 233 |
|            | #12     | 658      | 1179 | 187  | 1108 | 117 | 347   |        |      | #6    | 120 | 374 |
|            | #13     | 616      | 1123 | 169  | 930  | 97  | 214   |        |      | #7    | 77  | 201 |
|            | #14     | 1017     | 1612 | 137  | 881  | 79  | 386   |        |      | #8    | 210 | 529 |
|            | #22     | 1818     | 2956 | 100  | 683  | 113 | 226   |        |      | #9    | 206 | 514 |
|            | #23     | 342      | 957  | 160  | 1075 | 86  | 238   | 100    | 187  |       |     |     |
|            | #33     | 258      | 812  | 272  | 1268 | 52  | 257   | 64     | 279  |       |     |     |
| Figure 2B5 | #34     | 741      | 1316 | 139  | 896  | 181 | 394   | 150    | 351  |       |     |     |
|            | #15     | 574      | 1095 | 89   | 897  | 85  | 301   | 40     | 151  |       |     |     |

|            | mouse # | ins+tDT+ | Ins+ | Gcg+ | DT+  | Gcg+ | mice # | DT+ | Gast+ | DT+ | Ghrl+ | Ghrl+ |
|------------|---------|----------|------|------|------|------|--------|-----|-------|-----|-------|-------|
|            | #1      | 351      | 768  | 65   | 201  |      | #11    | 30  | 155   | 16  | 216   |       |
|            | #2      | 229      | 374  | 73   | 360  |      | #12    | 40  | 112   | 14  | 134   |       |
|            | #3      | 568      | 762  | 61   | 352  |      | #13    | 26  | 159   | 19  | 133   |       |
|            | #4      | 329      | 792  | 107  | 1092 |      | #14    | 57  | 192   | 16  | 104   |       |
|            | #5      | 260      | 465  | 129  | 840  |      | #15    | 28  | 133   | 13  | 110   |       |
|            | #6      | 164      | 332  | 45   | 308  |      | #16    | 38  | 137   | 21  | 92    |       |
| Figure 2C3 | #7      | 256      | 360  | 34   | 301  |      | #17    |     |       | 8   | 114   |       |
|            | #8      |          |      | 167  | 860  |      |        |     |       |     |       |       |

|            | mouse #   | Myt1+Ngr | Ngn3+ | mouse # | Myt1+Ngr | Ngn3+ |
|------------|-----------|----------|-------|---------|----------|-------|
| Figure 2D3 | control-1 | 115      | 243   | transge | 147      | 183   |
|            | control-2 | 87       | 186   | transge | 179      | 203   |
|            | control-3 | 85       | 206   | transge | 180      | 191   |

|        | mouse # | beta | alpha | mouse # | beta | alpha |
|--------|---------|------|-------|---------|------|-------|
| Figure | WT-1    | 1421 | 1016  | Transgt | 1622 | 809   |
|        | WT-2    | 1638 | 1233  | Transgt | 1273 | 987   |
|        | WT-3    | 1091 | 908   | Transgt | 1441 | 892   |

2E WT-4 976 930 Transgt 1387 731

|            | cotnrol1      |       | Mutant1 |               | control2 |              | mutant2 |      | contorl3 |      | mutant3 |      |
|------------|---------------|-------|---------|---------------|----------|--------------|---------|------|----------|------|---------|------|
| Figure 2F3 | alpha         | beta  | alpha   | beta          | alpha    | beta         | alpha   | beta | alpha    | beta | alph    | beta |
|            | 358           | 536   | 307     | 370           | 479      | 729          | 565     | 700  | 548      | 871  | 750     | 1022 |
|            | E12.5         |       |         |               | E14.5    |              |         |      |          |      |         |      |
|            | <b>bud #</b>  | alpha | beta    | alpha         | beta     | <b>bud #</b> | alpha   | beta | alpha    | beta |         |      |
|            | #1            | 209   | 572     | 143           | 284      | #1           | 275     | 909  | 586      | 1008 |         |      |
|            | #2            | 232   | 395     | 167           | 265      | #2           | 346     | 667  | 481      | 956  |         |      |
|            | #3            | 83    | 351     | 292           | 387      | #3           | 112     | 420  | 413      | 549  |         |      |
|            | #4            | 285   | 492     | 265           | 446      | #4           | 363     | 692  | 404      | 652  |         |      |
| Figure 4D  | control       |       |         |               | AzaC     |              |         |      | control  |      |         |      |
|            | DNMT1OE       |       |         |               | control  |              |         |      |          |      |         |      |
|            | <b>mice #</b> | alpha | beta    | <b>mice #</b> | alpha    | beta         |         |      |          |      |         |      |
|            | 1             | 722   | 437     | 1             | 930      | 640          |         |      |          |      |         |      |
|            | 2             | 548   | 394     | 2             | 322      | 463          |         |      |          |      |         |      |
|            | 3             | 95    | 78      | 3             | 425      | 441          |         |      |          |      |         |      |
| Figure 4G  | 4             | 1324  | 1157    | 4             | 1542     | 710          |         |      |          |      |         |      |
|            | 5             | 322   | 359     | 5             | 397      | 272          |         |      |          |      |         |      |
|            | dCas9-TG      |       |         |               | Control  |              |         |      |          |      |         |      |
|            | 1             | alpha | beta    | 1             | alpha    | beta         |         |      |          |      |         |      |
|            | 2             | 2508  | 1902    | 2             | 1254     | 822          |         |      |          |      |         |      |
|            | 3             | 1277  | 749     | 3             | 1811     | 1410         |         |      |          |      |         |      |
|            | 4             | 1670  | 651     | 4             | 1593     | 1222         |         |      |          |      |         |      |
| Figure 6E3 | 5             | 3562  | 1603    | 5             | 2762     | 2797         |         |      |          |      |         |      |
|            | 6             | 1319  | 571     |               |          |              |         |      |          |      |         |      |
